# Supplementary material for: The PhoP-Dependent ncRNA Mcr7 Modulates the TAT Secretion System in Mycobacterium tuberculosis
Source: PLOS journal article supplement (doi:10.1371/journal.ppat.1004183), 2014-05-29
Supplement: S1 (10.1371/journal.ppat.1004183.s001) [file journal.ppat.1004183.s001]

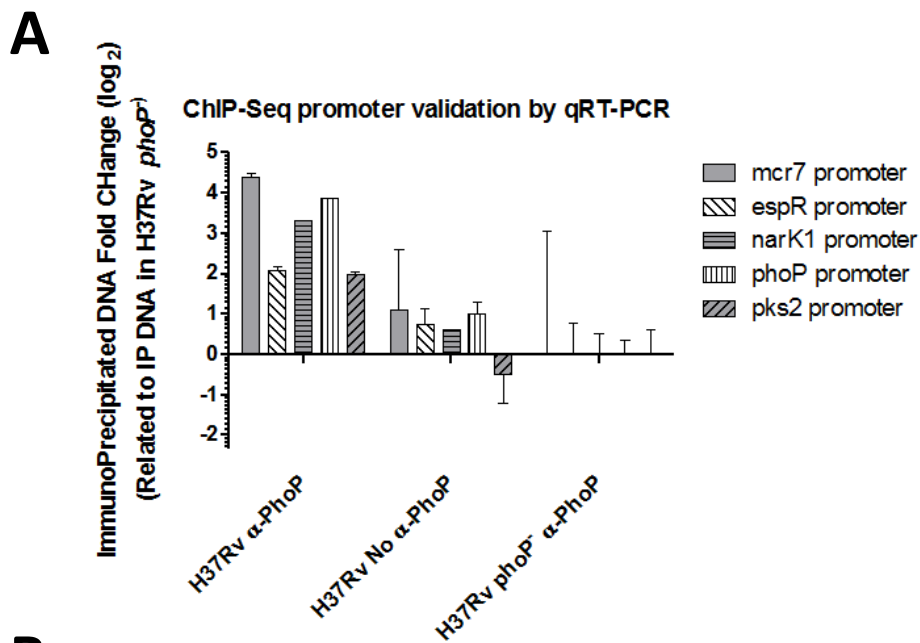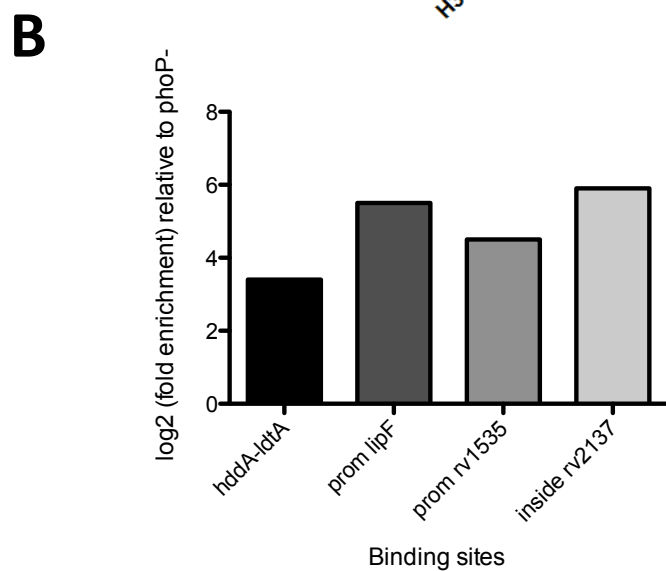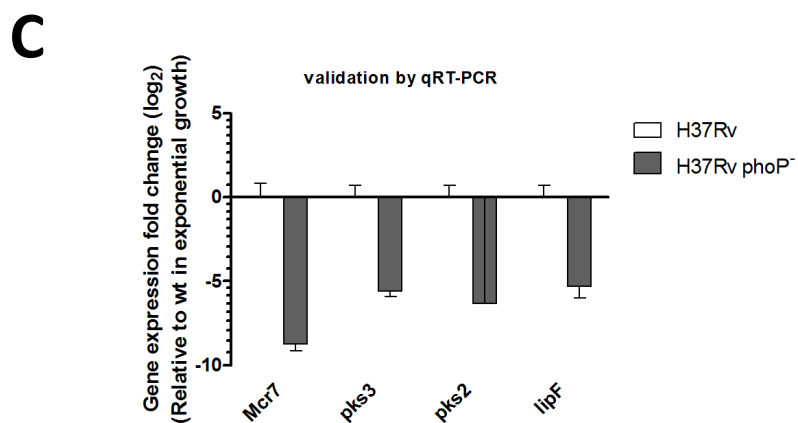

**Figure S1**
